# Supplementary material for: Environmental safety of nanocellulose: an acute in vivo study with marine mussels Mytilus galloprovincialis
Source: Royal Society of Chemistry journal article supplement (doi:10.1039/d3en00135k), 2023-11-14
Supplement: d3en00135k1.pdf [file d3en00135k1.pdf]

## Supplementary

### Environmental safety of nanocellulose: an *in vivo* acute study with marine mussels *Mytilus galloprovincialis*

Tatiana Rusconi<sup>1</sup>, Laura Riva<sup>2</sup>, Carlo Punta<sup>2</sup>, Montserrat Solé<sup>3</sup>, Ilaria Corsi<sup>1\*</sup>

<sup>1</sup>Department of Physical, Earth and Environmental Sciences, University of Siena, Italy

<sup>2</sup>Department of Chemistry, Materials, and Chemical Engineering "G. Natta" Politecnico di Milano, Milano, Italy

<sup>3</sup>Institut de Ciències del Mar, ICM-CSIC, Barcelona, Spain

\*Corresponding author, Phone: +39 0577 232169; email: [ilaria.corsi@unisi.it](mailto:ilaria.corsi@unisi.it)

Number of pages: 7

Number of tables: 4

Number of figures: 3

#### Additional description of methods

Carboxylesterase (CbE) activity was measured using 25  $\mu\text{L}$  of undiluted gills and 25  $\mu\text{L}$  of digestive gland sample (10-fold diluted) mixed with 200  $\mu\text{L}$  of a solution containing *p*-nitrophenyl acetate (pNPA) or *p*-nitrophenyl butyrate (pNPA) as substrates at 1 mM final concentration in well. For both substrates reading was performed at 405 nm for 5 minutes ( $\epsilon = 18,0 \text{ mM}^{-1}\text{cm}^{-1}$ ) according to the method of Hosokawa and Satoh <sup>1</sup> adapted by Solé *et al.* <sup>2</sup>. Commercial recombinant human hCE1 (E0162) was used as positive control.

The activity of GST was analyzed according to the method of Habig *et al.* <sup>3</sup>. In each well 25  $\mu\text{L}$  of undiluted sample (gills) or 10-fold diluted (digestive gland) was added to 200  $\mu\text{L}$  of reaction mixture (containing in well: 1 mM GSH, 1 mM CDNB). Positive control of commercial GST (G6511) was used. Reading was performed 340 nm for 3 minutes. The activity was calculated by using  $\epsilon = 9,6 \text{ mM}^{-1}\text{cm}^{-1}$ .

CAT activity was measured according to Aebi *et al.* <sup>4</sup>. In each well, 10  $\mu\text{L}$  of diluted sample (4-fold for gills and 10-fold for digestive gland) were added to 200  $\mu\text{L}$  of reaction mixture containing  $\text{H}_2\text{O}_2$  (50 mM final well concentration). Commercial purified catalase (Sigma ref.

SRE0041) was used as positive control. The reading was performed at 240 nm for 1 minute using  $\epsilon = 40 \text{ M}^{-1}\text{cm}^{-1}$ .

The activity of GR was measured by placing 20  $\mu\text{L}$  of undiluted sample and 200  $\mu\text{L}$  of a mixture containing 1 mM GSSG and 0.5 mM NADPH as final concentrations. Commercial GR (Sigma ref. G3664) was used as positive control. The reading was performed at 340 nm for 3 minutes according to the method of Calberg and Mannervik<sup>5</sup> with  $\epsilon = 6.22 \text{ mM}^{-1}\text{cm}^{-1}$ .

The GPX activity was measured using both cumene hydroperoxide (CHP) and H<sub>2</sub>O<sub>2</sub> as substrates adapting the method of Günzler and Flohé<sup>6</sup>. For both gills and digestive gland tissues, in each well 10  $\mu\text{L}$  of undiluted sample were placed and then 200  $\mu\text{L}$  of reaction mixture (0.1 mM NADPH, 1.6 mM GSH and 1 U/mL GR as final concentrations) when using CHP as substrate or 200  $\mu\text{L}$  reaction mixture containing 0.125 mM NADPH, 2.075 mM GSH, 1 U/mL GR and 1.038 mM NaN<sub>3</sub>) when using H<sub>2</sub>O<sub>2</sub> as substrate. After 2 minutes of incubation, 30  $\mu\text{L}$  of CHP (final concentration 0.625 mM) or 30  $\mu\text{L}$  of H<sub>2</sub>O<sub>2</sub> (0.2 mM) were added. An extract of fish liver (*Sparus aurata*) was used as positive control. For both substrates, the reading was done at 340 nm for 3 minutes. GPx activity was calculated with  $\epsilon = 6.22 \text{ mM}^{-1}\text{cm}^{-1}$ .

The total protein content in each tissue was done using the Bradford Method<sup>7</sup>. A 7-point bovine serum albumin (BSA) (0.05 – 0.5 mg mL<sup>-1</sup>) was used for protein content calculation. 10  $\mu\text{L}$  of samples and standards were mixed with 200  $\mu\text{L}$  of Bradford reagent BioRad and after 15 minutes agitation the absorbance was read at 595 nm and protein content expressed in mg mL<sup>-1</sup>.

The lipid peroxidation levels (LPO) were measured in terms of malondialdehyde (MDA) equivalents using 200  $\mu\text{L}$  of undiluted samples mixed with 650  $\mu\text{L}$  of 1-methyl- 2-phenylindole in methanol:acetonitrile (1:3) and 150  $\mu\text{L}$  of 37 % HCl. Six point standards (0.1- 12.5  $\mu\text{M}$ ) were made, with 1,1,3,3 tetramethoxypropane. Simultaneously, samples and standards were vortexed and then kept in a water bath at 45°C for 40 minutes. After that, the reaction was stopped in ice for 10 min, then centrifuged at 10,000 rpm for 10 minutes. A 200  $\mu\text{L}$  aliquot of the supernatant of sample and standards was read at 586 nm.

## Integration of Results

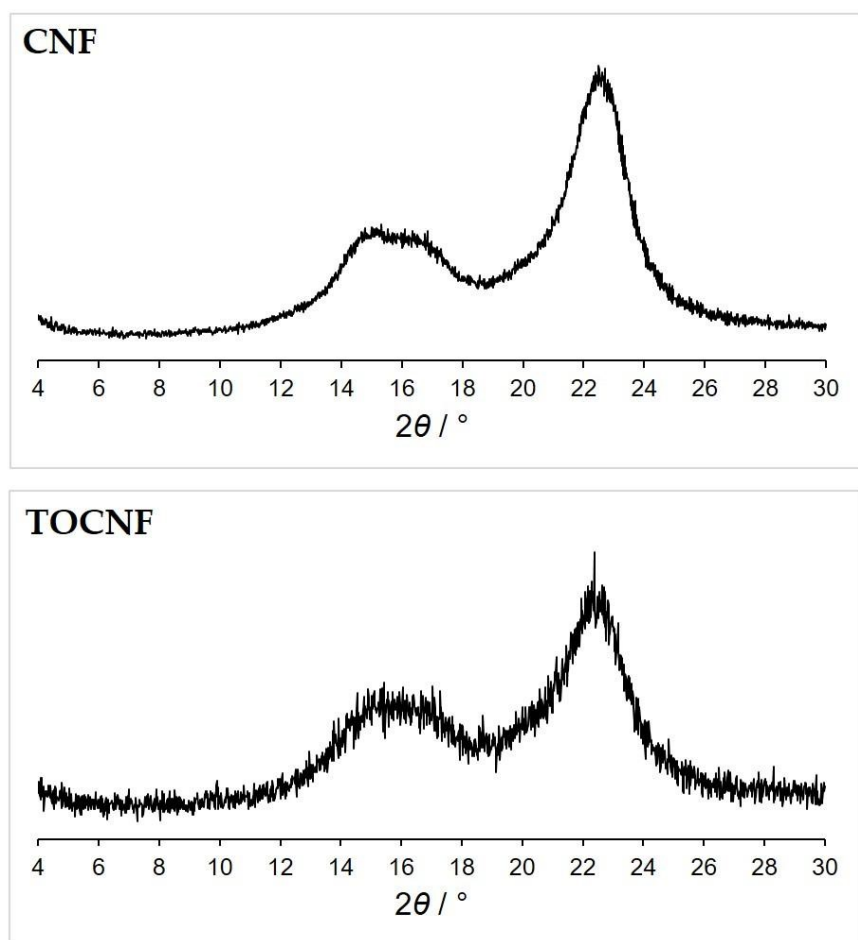

**Figure S1.** XRD diffractograms of CNF and TOCNF, recorded for the calculation of the Crystallinity Index.

**Table S1.** pH and salinity values of CNF and TOCNF (1mg L<sup>-1</sup>) water suspensions over time (t0= right after dispersion, t1= 24h, t2= 5 weeks t3=6 weeks. Data shown as mean values ± standard deviation (n=3 independent measurements).

| pH           | NSW        | ASW        | NSW + CNF  | ASW+ CNF   | NSW + TOCNF | ASW + TOCNF |
|--------------|------------|------------|------------|------------|-------------|-------------|
| t0           | 8.2 ± 0.01 | 8.1 ± 0.06 | 8.1 ± 0.01 | 8.1 ± 0.03 | 8.1 ± 0.14  | 8.1 ± 0.05  |
| t1           | 7.9 ± 0.06 | 8.1 ± 0.03 | 8.0 ± 0.05 | 8.1 ± 0.05 | 7.8 ± 0.05  | 8.2 ± 0.01  |
| t2           | 7.9 ± 0.06 | 8.1 ± 0.04 | 7.7 ± 0.03 | 7.7 ± 0.04 | 7.8 ± 0.05  | 8.1 ± 0.05  |
| t3           | 7.9 ± 0.06 | 8.1 ± 0.01 | 7.8 ± 0.04 | 7.9 ± 0.04 | 7.8 ± 0.02  | 8.0 ± 0.02  |
| Salinity (‰) | NSW        | ASW        | NSW + CNF  | ASW+ CNF   | NSW + TOCNF | ASW + TOCNF |
| t0           | 41 ± 0.01  | 41 ± 0.00  | 41 ± 0.01  | 41 ± 0.01  | 41 ± 0.01   | 41 ± 0.01   |
| t1           | 41 ± 0.00  | 39 ± 0.01  | 41 ± 0.01  | 39 ± 0.01  | 41 ± 0.01   | 39 ± 0.01   |
| t2           | 41 ± 0.00  | 40 ± 0.01  | 40 ± 0.01  | 39 ± 0.01  | 40 ± 0.01   | 39 ± 0.01   |
| t3           | 40 ± 0.01  | 39 ± 0.00  | 41 ± 0.01  | 39 ± 0.01  | 40 ± 0.01   | 41 ± 0.01   |

**Table S2.** Neutral red retention time (NRRT) assay in hemocytes of mussels exposed to 1 µg L<sup>-1</sup> and 1 mgL<sup>-1</sup> of CNF and TOCNF. Data are shown as % of destabilized cells out of 100 scored.

| Concentrations tested |           | 1µg L <sup>-1</sup> |           |           | 1mg L <sup>-1</sup> |            |          |
|-----------------------|-----------|---------------------|-----------|-----------|---------------------|------------|----------|
| Tissues               | Hemolymph |                     |           |           |                     |            |          |
| Time                  |           | 15 min              | 30 min    | 45 min    | 15 min              | 30 min     | 45 min   |
| NRRT                  | Control   | 19 ± 6.24           | 35 ± 2.65 | 43 ± 2    | 33.7 ± 3.1          | 44 ± 2.6   | 63.7 ± 5 |
|                       | CNF       | 30 ± 1              | 69 ± 5.29 | 90 ± 3    | 36.3 ± 3.5          | 60 ± 8.2   | 75 ± 3.6 |
|                       | TOCNF     | 25 ± 3.61           | 76 ± 2.65 | 92 ± 3.61 | 39.7 ± 3.1          | 64.7 ± 4.9 | 61 ± 1   |

**Table S3.** P-glycoprotein efflux pump activity expressed as Arbitrary Units of Fluorescence (AUF) in gills of mussels exposed to  $1 \mu\text{g L}^{-1}$  and  $1 \text{mg L}^{-1}$  of CNF and TOCNF and known inhibitor Verapamil ( $1\mu\text{M}$ ).

| Concentrations tested |           | $1\mu\text{g L}^{-1}$  | $1\text{mg L}^{-1}$  |
|-----------------------|-----------|------------------------|----------------------|
| Tissues               |           | Gill                   | Gill                 |
| P-gp activity         | Control   | $47698 \pm 11457.92$   | $22763 \pm 4407.45$  |
|                       | CNF       | $90053.4 \pm 12791.09$ | $75673 \pm 16437.38$ |
|                       | TOCNF     | $90864.4 \pm 18386.12$ | $67399 \pm 8294.02$  |
|                       | VERAPAMIL | $89368.2 \pm 14676.93$ | $54381 \pm 16299.19$ |

**Table S4.** Activity of ASCh-ChE in hemolymph, gills and digestive glands of mussels exposed to  $1 \mu\text{g L}^{-1}$  and  $1 \text{mg L}^{-1}$  of CNF and TOCNF. The activity is expressed as  $\text{nmolmin}^{-1}\text{mgprotein}^{-1}$ . The number of biological replicates was  $n=6$  for gills,  $n= 4$  for digestive gland and  $n= 6$  for hemolymph

| Concentration tested |         | $1\mu\text{g L}^{-1}$ |                   |                  | $1\text{mg L}^{-1}$ |                 |                  |
|----------------------|---------|-----------------------|-------------------|------------------|---------------------|-----------------|------------------|
| Tissues              |         | Gill                  | Digestive gland   | Hemolymph        | Gill                | Digestive gland | Hemolymph        |
| ChE ASCh             | Control | $3.29 \pm 1.6$        | $1.778 \pm 0.46$  | $14.47 \pm 1.94$ | $3.89 \pm 0.8$      | $1.58 \pm 0.8$  | $18.95 \pm 4.4$  |
|                      | CNF     | $2.99 \pm 0.36$       | $1.646 \pm 0.513$ | $12.79 \pm 2.09$ | $2.59 \pm 0.21$     | $1.54 \pm 0.64$ | $20.25 \pm 3.23$ |
|                      | TOCNF   | $2.74 \pm 1.3$        | $1.492 \pm 0.208$ | $11.55 \pm 2.67$ | $2.98 \pm 0.4$      | $1.66 \pm 0.53$ | $13.45 \pm 1.31$ |

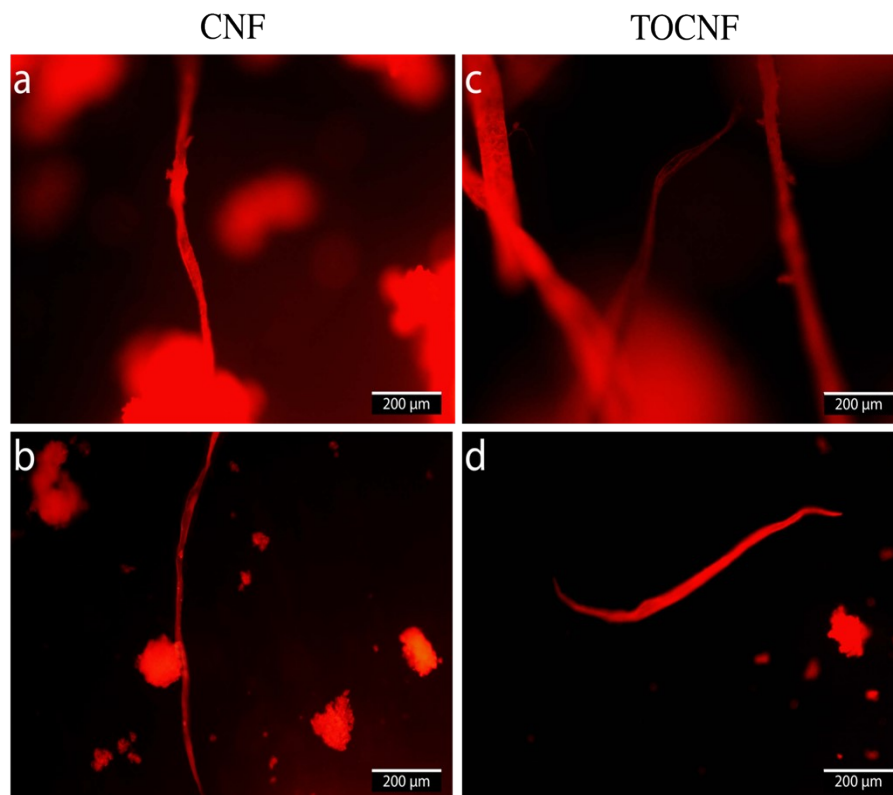

**Figure S2.** Fluorescence microscopy images of CNF and TOCNF labelled with RhB before and after incubation in NSW at  $1\text{mg mL}^{-1}$  (a) pre-incubation CNF (b) after 24h of incubation (c) pre-incubation TOCNF (d) after 24h of incubation.

## TOCNF

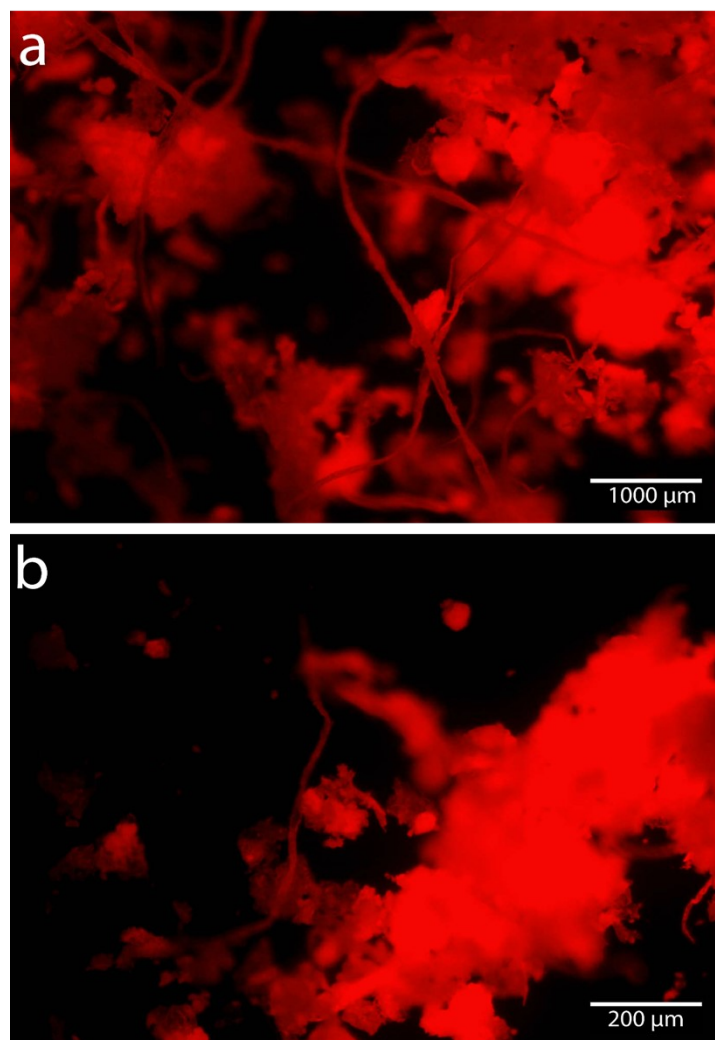

**Figure S3.** Fluorescence microscopy images of dry TOCNF stained with RhB and TOCNF stained with RhB after 24h of incubation in NSW (1mg mL<sup>-1</sup>). (a) TOCNF (b) TOCNF after 24h incubation.

### References

1. M. Hosokawa, T. Satoh T., Measurement of carboxylesterase (CES) activities, *Current Protocol in Toxicology*, 2022 4 (4.7).
2. M. Solé M; G. Rivera-Ingraham, R. Freitas, The use of carboxylesterases as biomarkers of pesticide exposure in bivalves: A methodological approach, *Comparative Biochemistry and Physiology Part C: Toxicology & Pharmacology*, 2018, 212, 18–24
3. H. Aebi, Catalase, *Methods of Enzymatic Analysis (Second Edition)*, Academic Press, 1974, 673-684.
4. I. Carlberg, B. Mannervik, Glutathione reductase. *Methods in Enzymology*, 1985, 113, 484-490.
5. L. Flohé, W. A. Günzler, Assays of glutathione peroxidase. *Methods in Enzymology*, 1984, 105, 114-21.
6. M. M. Bradford, A rapid and sensitive method for the quantitation of microgram quantities of protein utilizing the principle of protein-dye binding. *Analytical Biochemistry*, 1997, 7(72), 48-54.
